# Supplementary material for: A self-assembled molecularly triboelectronegative cellulose nanofiber material with ultrahigh contact triboelectrification for the design of green triboelectric nanogenerators
Source: Royal Society of Chemistry journal article supplement (doi:10.1039/d2se01715f), 2023-01-01
Supplement: d2se01715f1.pdf [file d2se01715f1.pdf]

## Supporting Information

### Self-assembled molecularly triboelectronegative cellulose nanofiber material with ultrahigh contact triboelectrification for design of green triboelectric nanogenerators

Yang Li<sup>a</sup>, Nannan Wang<sup>c\*</sup>, Sheng Wang<sup>c</sup>, Bofan Li<sup>c</sup>, Enyi Ye<sup>b, c</sup>, Xianjun Loh<sup>b, c</sup>, Zibiao Li<sup>b, c, d\*</sup>

<sup>a</sup> Blood Transfusion Department, Zhongnan Hospital of Wuhan University, Wuhan 430071, China

<sup>b</sup> Institute of Materials Research and Engineering (IMRE), A\*STAR (Agency for Science, Technology and Research), 2 Fusionopolis Way, Innovis, #08-03, Singapore 138634, Singapore

<sup>c</sup> Institute of Sustainability for Chemicals, Energy and Environment (ISCE<sup>2</sup>), A\*STAR, 2 Fusionopolis Way, Innovis, #08-03, Singapore 627833, Singapore

<sup>d</sup> Department of Materials Science and Engineering, National University of Singapore, Singapore 117575, Singapore

\*Corresponding Author. E-mail: wang\_nannan@isce2.a-star.edu.sg; lizb@imre.a-star.edu.sg

## Supplementary Figures

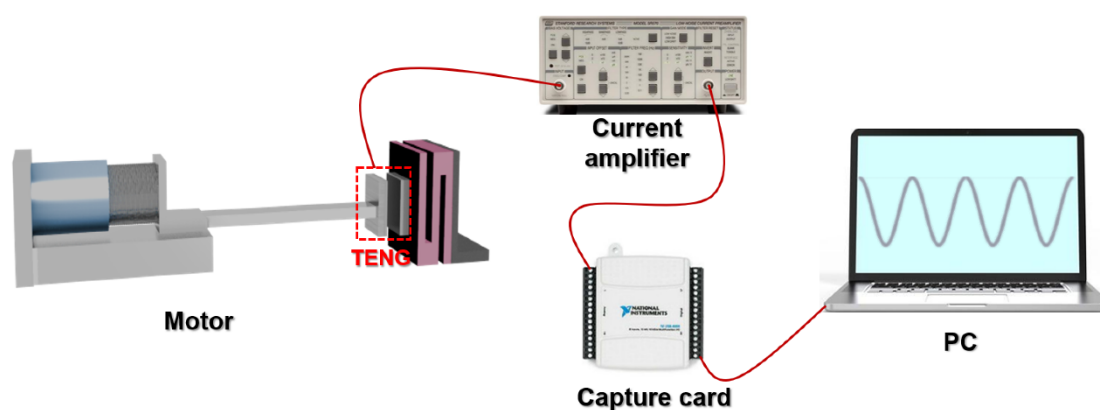

Fig. S1 Schematic diagram of TENG test.

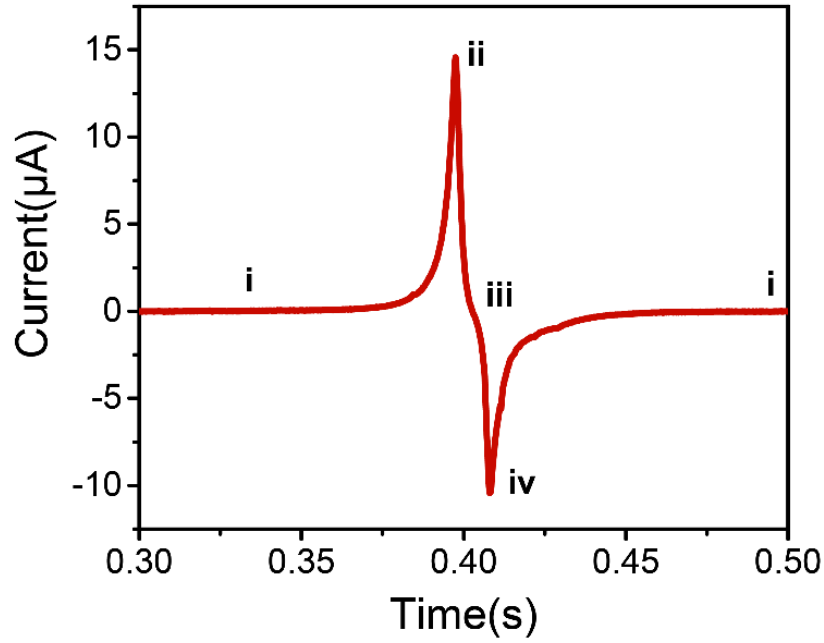

**Fig. S2** Corresponding electrical signals during the contact-separation process of the TENG's tribolayers.

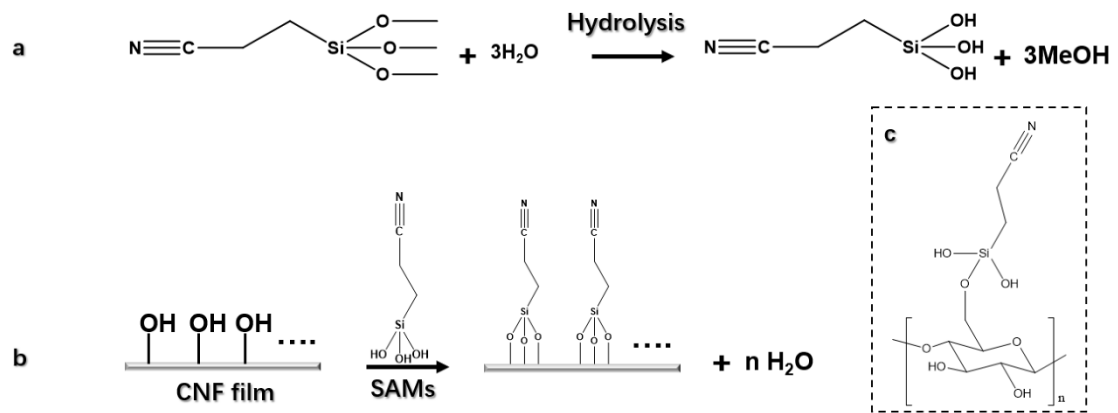

**Fig. S3** Schematic diagram of the preparation process of TESP@CNF film. (a) Hydrolysis of TESP. (b) Self-assembly process of TESP on the surface of hydroxyl-rich CNF film. (c) Schematic diagram of the molecular structure of TESP@CNF.

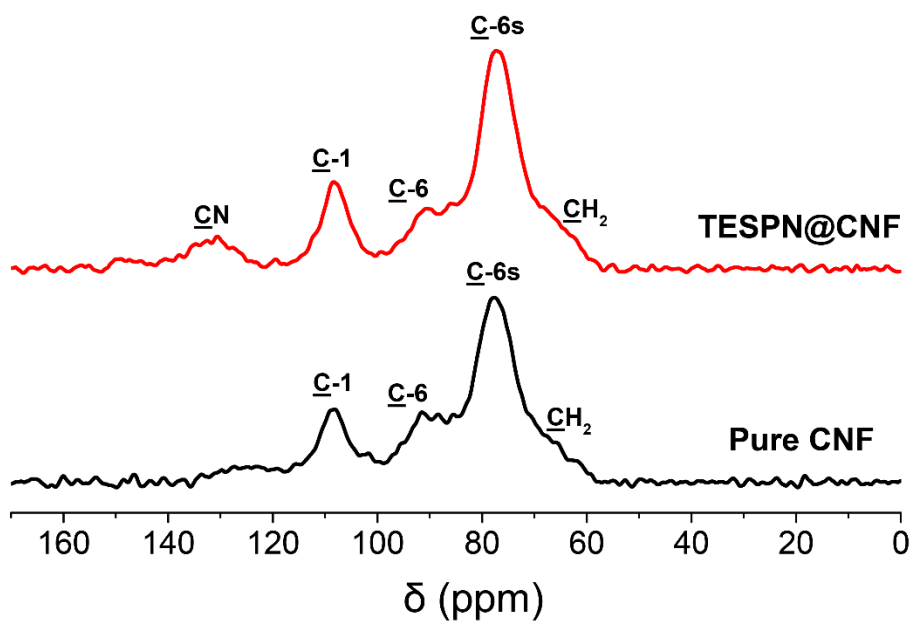

**Fig. S4**  $^{13}\text{C}$  solid-state NMR comparison of pure CNF and TESP@CNF.

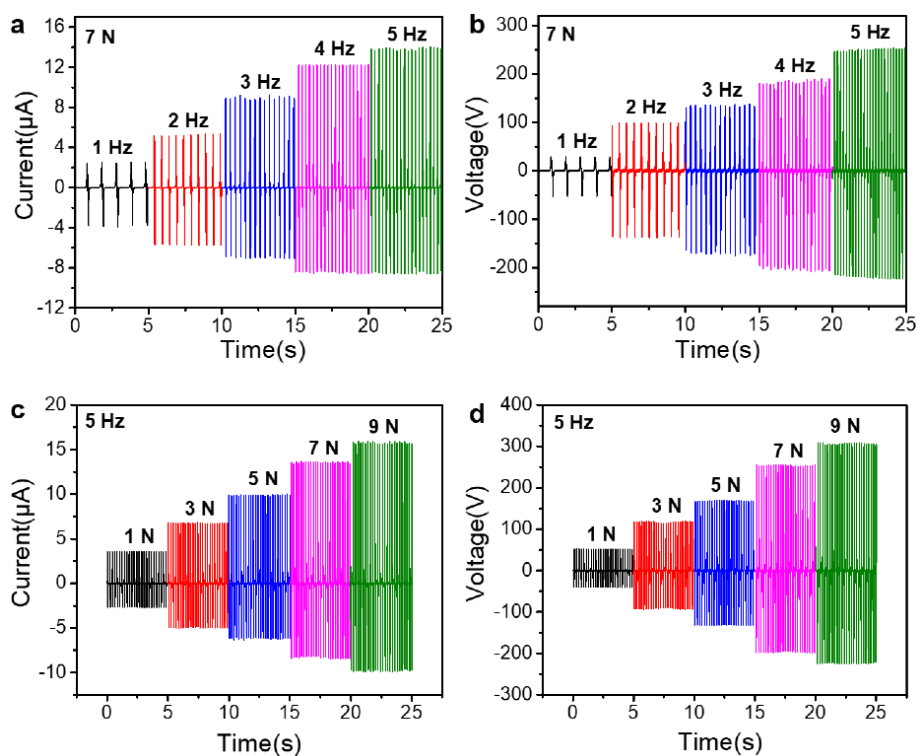

**Fig. S5** Comparison of (a) output current and (b) output voltage of TESP@CNF-based TENG at different frequencies. (c) Output current and (d) output voltage of TESP@CNF-based TENG under different impact forces.

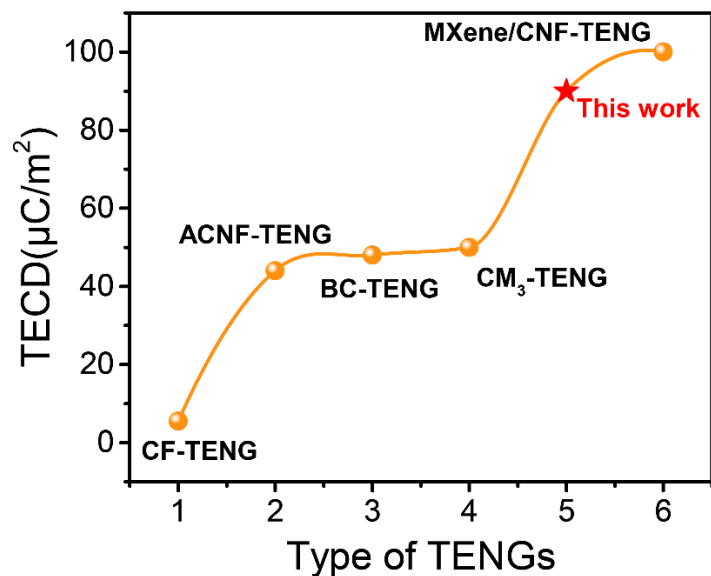

**Fig. S6** TECD comparison of CNF-based TENG reported in recent years.

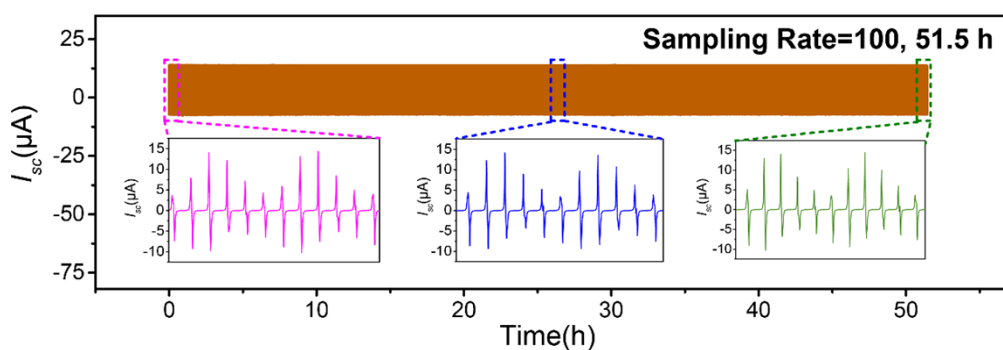

**Fig. S7** Durability testing of TESP@CNF-based TENG.

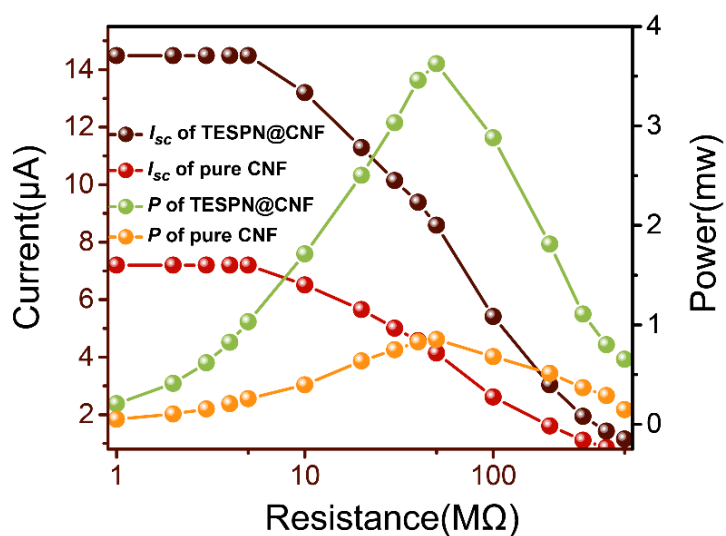

**Fig. S8** Dependence of the  $I_{sc}$  and the corresponding power on the external loading resistance of CNF-SO<sub>3</sub>Na-PTFE based TENG.

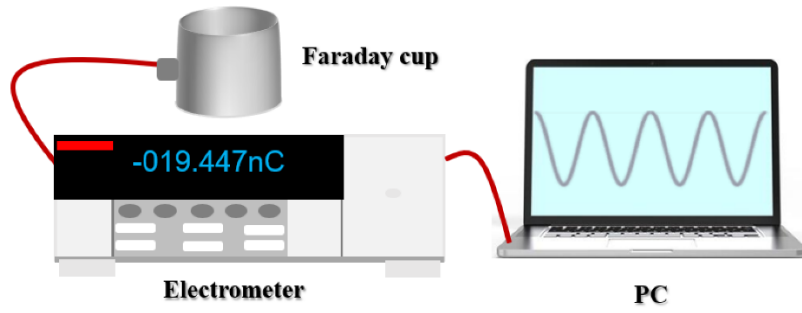

**Fig. S9** Schematic of real-time charge tested by the Faraday cup.

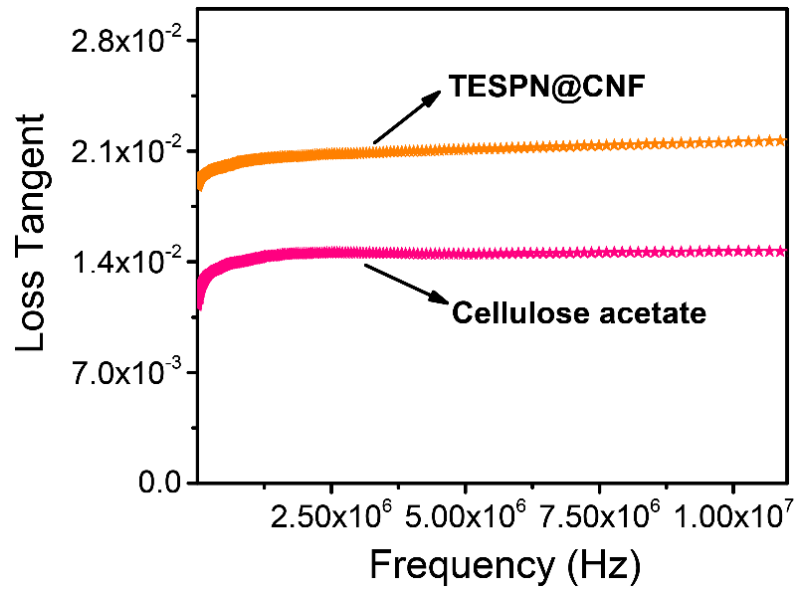

**Fig. S10** Dielectric loss comparison of cellulose acetate and TESPN@CNF films.

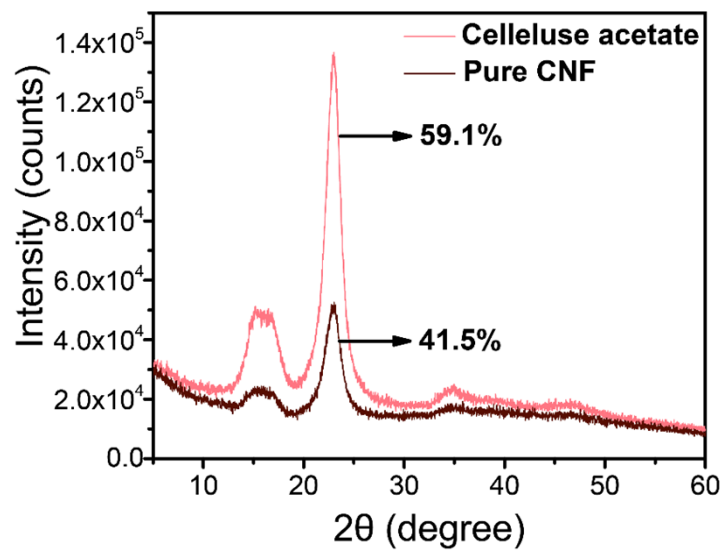

**Fig. S11** XRD of cellulose acetate and TESPN@CNF films.

**Table R1.** The atomic content of N and Si in the TESPN@CNF film measured by XPS.

| Name | Start BE | Peak BE | End BE | Height CPS | FWHM eV | Area (P) CPS.eV | Area (N) TPP-2M | Atomic % |
|------|----------|---------|--------|------------|---------|-----------------|-----------------|----------|
| C1s  | 297.98   | 285.03  | 279.18 | 94423.32   | 1.77    | 301994.9        | 4235.3          | 65.64    |
| N1s  | 409.98   | 399.61  | 392.18 | 4971.7     | 2.5     | 12496.68        | 113.26          | 1.74     |
| O1s  | 544.98   | 532.52  | 525.18 | 144443.04  | 2.21    | 349107.62       | 2026.24         | 31.4     |
| Si2p | 109.98   | 102.27  | 95.18  | 1374.14    | 2.42    | 4558.51         | 77.22           | 1.21     |

## Supplementary Movies

**Supplementary Video 1:** Demonstration experiment of TESPN@CNF-based TENG powering 63 LEDs and electronic watch.

**Supplementary Video 2:** Demonstration experiment of joint state monitoring of TESPN@CNF-based TENG attached to the human body.
